# Supplementary material
Source: PubMed Central journal article supplement (PMC3315228)
Supplement: supp_tpc.111.090894_Mueller-Roeber_Supplemental_Data_Final.pdf [file supp_tpc.111.090894_Mueller-Roeber_Supplemental_Data_Final.pdf]

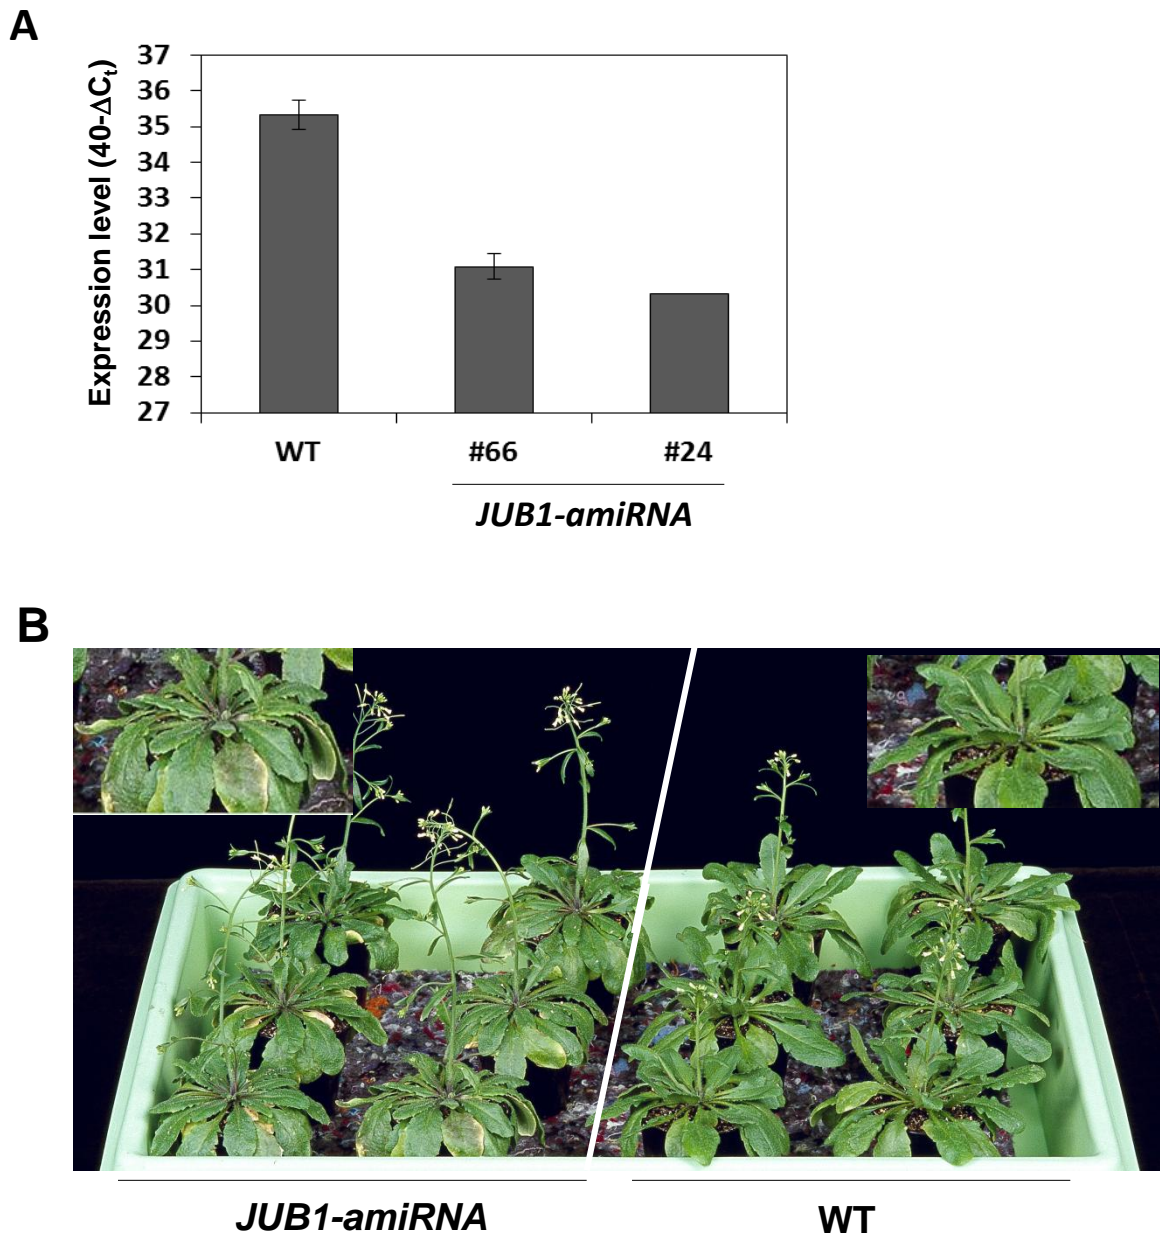

**Supplemental Figure 1. Early Leaf Senescence in *JUB1-amiRNA* Lines.**

**(A)** *JUB1* expression level is reduced in two *JUB1-amiRNA* lines (lines #66 and #24). Data are the means  $\pm$  SD; WT, n = 3; #66, n = 6; #24, n = 1. **(B)** *JUB1-amiRNA* lines exhibit earlier leaf senescence and bolt earlier (~2 d), as compared to wild-type (WT) plants. The picture was taken ~40 days after sowing.

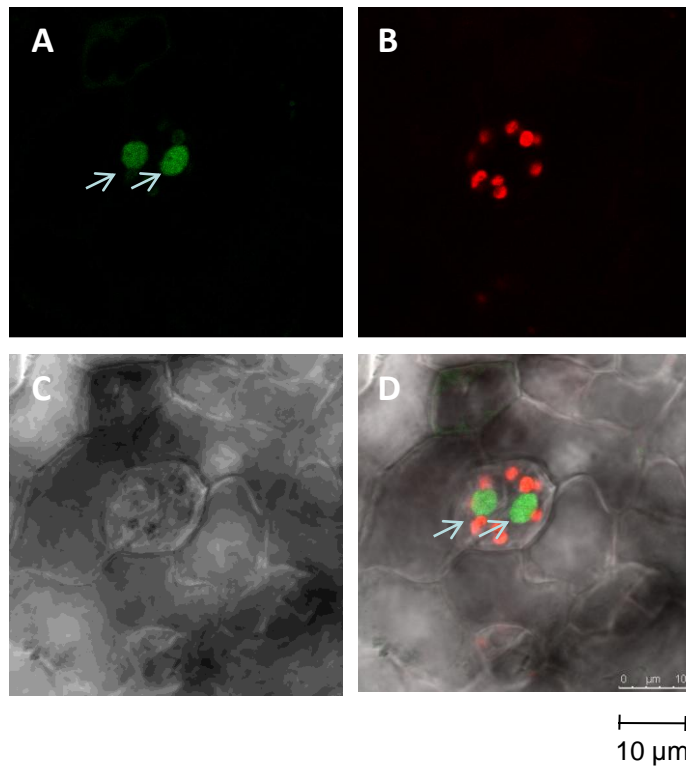

**Supplemental Figure 2. Localization of JUB1-GFP Fusion Protein in Guard Cells of Transgenic *Arabidopsis*.**

**(A)** GFP fluorescence. **(B)** Chlorophyll autofluorescence. **(C)** Transmitted light. **(D)** Merged. Arrows indicate green fluorescence due to the presence of JUB1-GFP fusion protein in nuclei.

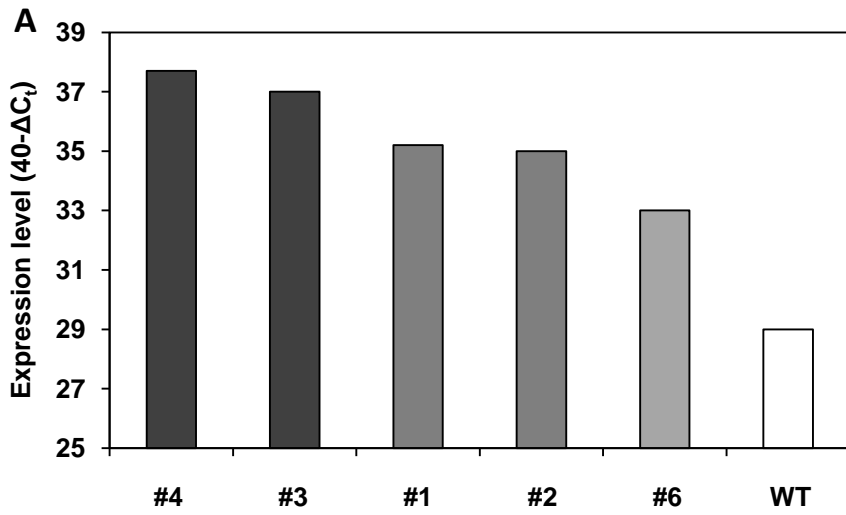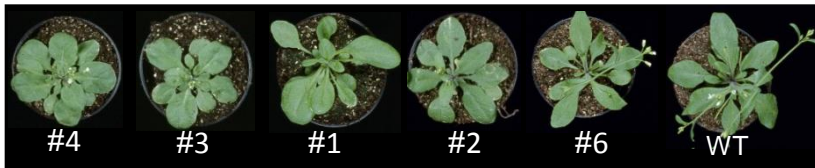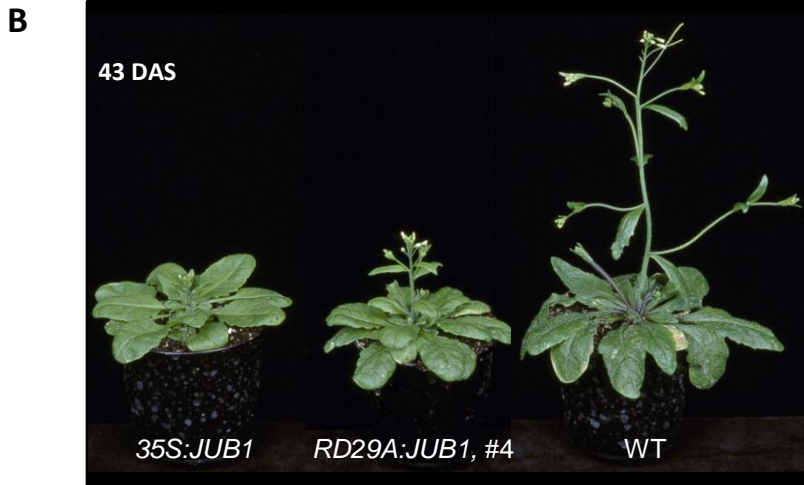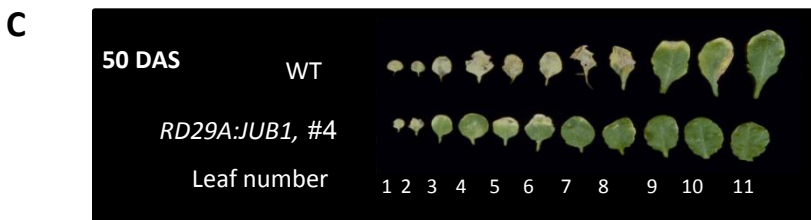

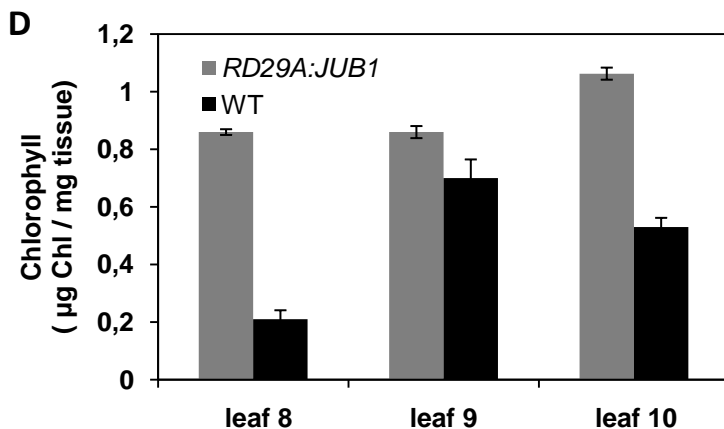

**Supplemental Figure 3. Phenotypic and Physiological Analyses of Transgenic Plants Overexpressing *JUB1* under Control of Stress-inducible Promoter *RD29A*.**

**(A)** *JUB1* expression in individual *RD29A:JUB1* transformants and the wild type (WT), determined by qRT-PCR (single measurements). Plants were grown in long-day condition (16 h / 8 h, light / dark) and the five biggest rosette leaves of 35-day-old plants were harvested for expression analysis. Note the correlation of *JUB1* expression level and the strength of the observed phenotype (delayed bolting). **(B)** Phenotypes of 43-day-old *35S:JUB1*, *RD29A:JUB1* (#4) and WT plants. **(C)** Leaves 1 to 11 of 50-day-old WT and *RD29A:JUB1* (#4) plants; leaf no. 1 is the first leaf emerging after the cotyledons. Delayed leaf senescence is observed in the overexpression line. **(D)** Chlorophyll content of leaves 8, 9 and 10 of *RD29A:JUB1* (#4) and WT plants at 50 DAS (from leaves equivalent to those shown in panel C). Values are means  $\pm$  SD; n = 3.

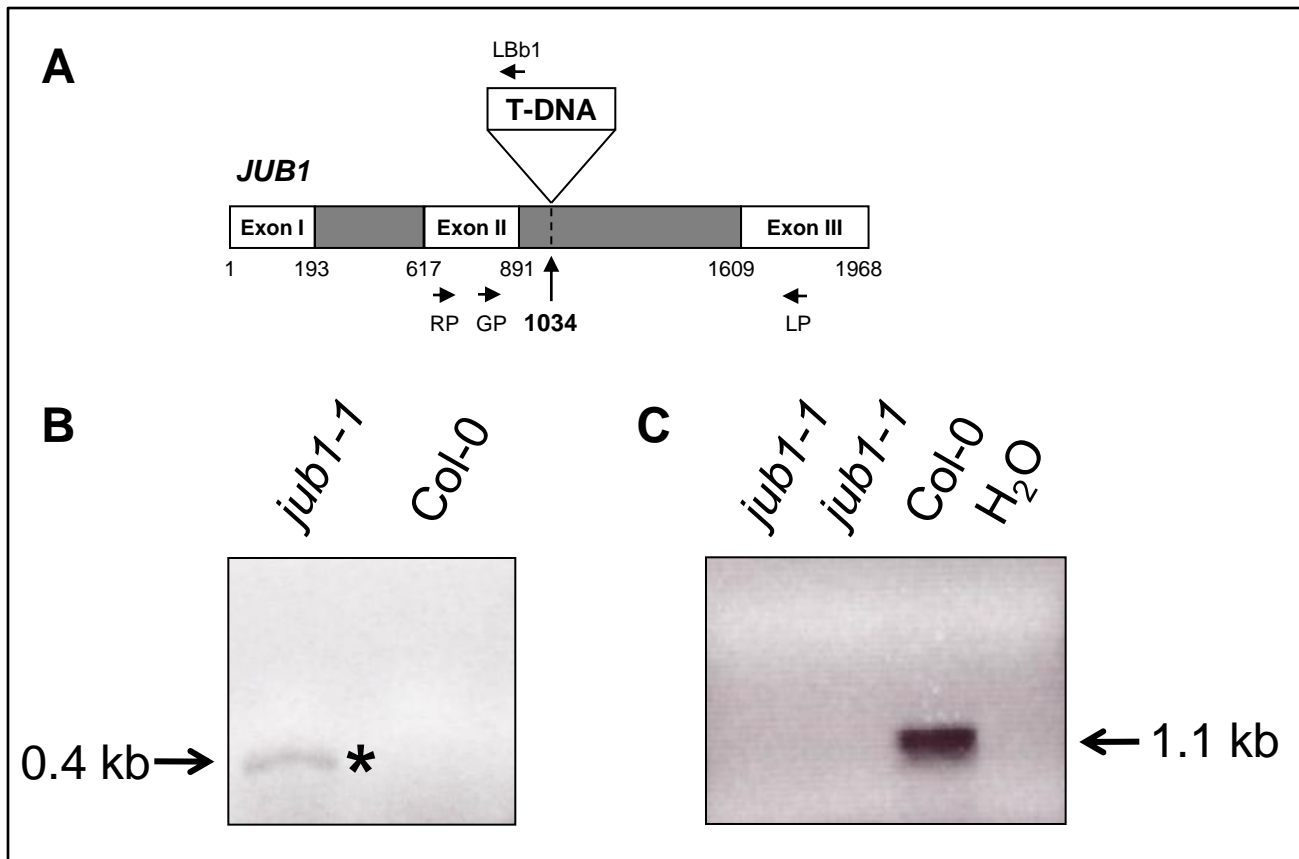

#### Supplemental Figure 4. Confirmation of T-DNA Insertion in *jub1-1* Mutant.

**(A)** Schematic presentation of *JUB1* (transcribed region) with the T-DNA insertion point labelled. Positions of primers used for PCR are shown by horizontal arrows. Numbers indicate nucleotide positions. **(B)** PCR-mediated amplification of genomic DNA using *JUB1*-specific primer GP (5'-ACTGTGTTGGTCTCAAGAAATC-3') and T-DNA-specific primer LBb1 (5'-GCGTGGACCGCTTGCTGCAACT-3'). The DNA band visible in the *jub1-1* lane, indicated by a star (\*), was isolated from the gel and sequenced to confirm the T-DNA insertion site. No such band was generated from *Arabidopsis Col-0* DNA, as expected. **(C)** Amplification of genomic DNA using *JUB1*-specific primers RP (5'-AGGAATAGCGTTCGACCAAAC-3') and LP (5'-TGGAATCTACTGTACGGTGGC-3'). DNA is only amplified from the *Col-0* accession, but not from the homozygous *jub1-1* mutant (results from two PCRs shown). Genomic input DNA was omitted in lane 'H<sub>2</sub>O'. Fragment sizes are indicated.

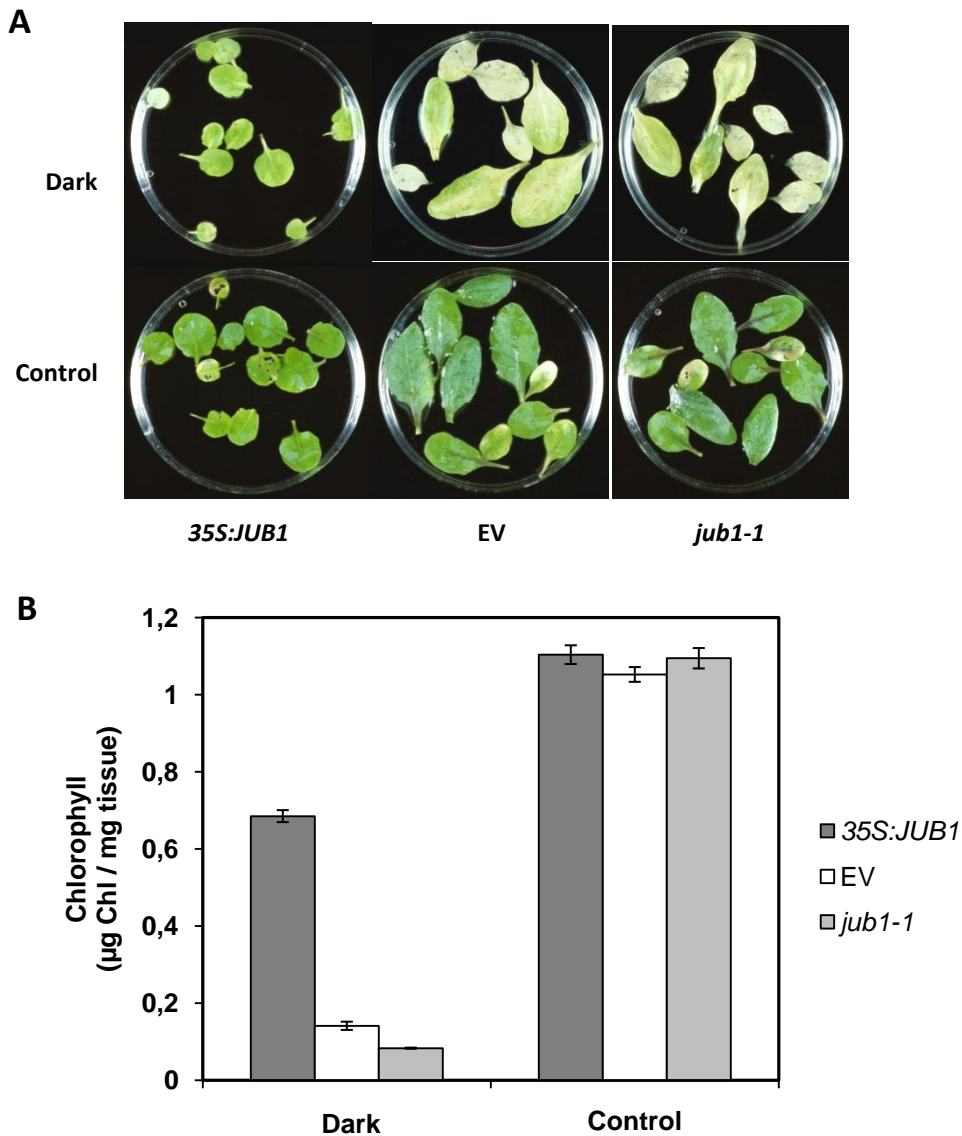

**Supplemental Figure 5. Dark-induced Senescence is Affected in Detached Leaves of *JUB1* Overexpressors.**

**(A)** Rosette leaves of 39-day-old *35S:JUB1* overexpression, *jub1-1* and EV control plants were detached and placed on moist filter paper in Petri dishes. Petri dishes were kept in continuous darkness for 6 days. Note the retarded senescence in *35S:JUB1* leaves. Similar results were obtained in two additional independent experiments. **(B)** Chlorophyll content in leaves incubated for 6 days. Data are the means of at least three replicates  $\pm$  SD obtained from plants at 39 DAS. For control experiments, plants were kept at a 16 h / 8 h light / dark cycle.

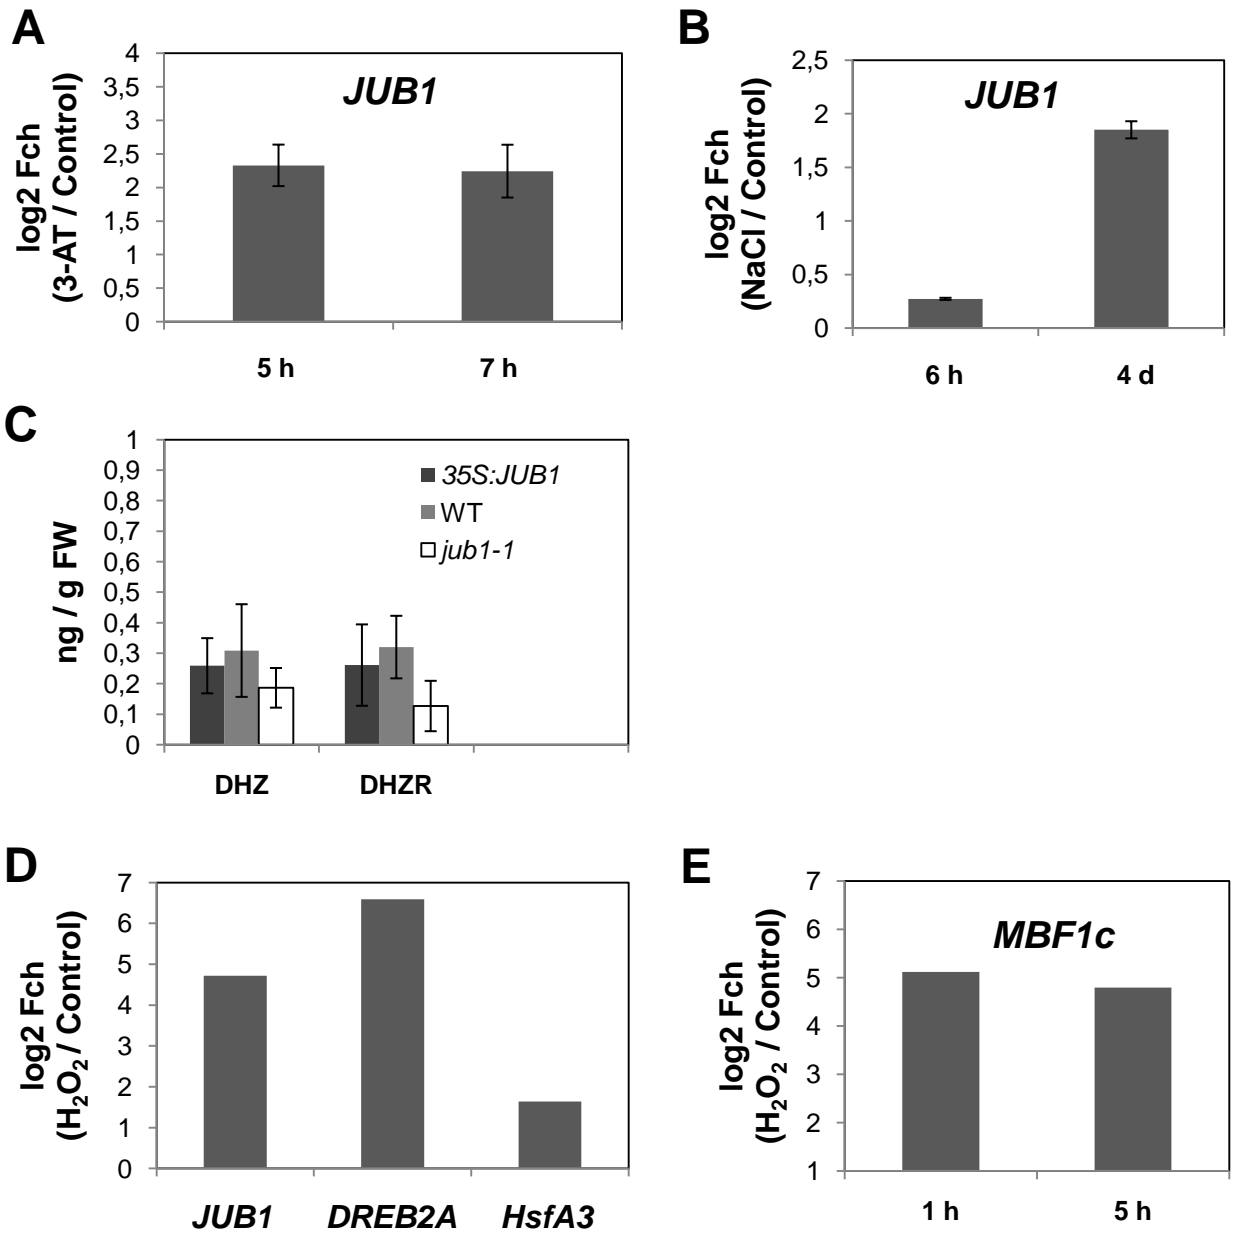

**Supplemental Figure 6. Gene Expression and Hormone Levels in *Arabidopsis* Plants Subjected to Different Treatments.**

**(A)** Induction of *JUB1* expression upon pharmacological inhibition of the H<sub>2</sub>O<sub>2</sub>-scavenging enzyme catalase by 3-amino-1,2,4-triazole (3-AT) in *Arabidopsis* seedlings. Two-week-old seedlings were transferred to medium containing 1 mM 3-AT and incubated for 5 h and 7 h, respectively. Values represent the means  $\pm$  SD from three independent biological experiments. Numbers on the Y axis indicate log<sub>2</sub> fold-change expression ratio compared to untreated samples. **(B)** Analysis of *JUB1* expression under salt stress. *Arabidopsis* Col-0 plants were grown in a hydroponic culture system and were subjected to short- or long-term (6 h and 4 d, respectively) salinity stress (150 mM NaCl). Salt stress was applied to plants at developmental stage 1, according to Balazadeh *et al.* (2010a). Values represent the means  $\pm$  SD from three independent biological experiments. **(C)** Determination of dihydrozeatin (DHZ) and dihydrozeatin riboside (DHZR) in 43-day-old 35S:*JUB1*, *jub1-1* and WT plants grown at long-day condition (16 h light / 8 h dark). Values represent the means  $\pm$  SD from five independent biological sets of samples. **(D)** Induction of *JUB1*, *DREB2A* and *HsfA3* expression after 5 h of H<sub>2</sub>O<sub>2</sub> treatment. **(E)** Induction of *MBF1c* expression after 1 h and 5 h of H<sub>2</sub>O<sub>2</sub> treatment. In (D) and (E), two-week-old seedlings were transferred to medium containing 10 mM H<sub>2</sub>O<sub>2</sub> and incubated for the indicated times. Numbers on the Y axis indicate log<sub>2</sub> fold-change expression ratio compared to untreated control. Means from two independent experiments are shown.





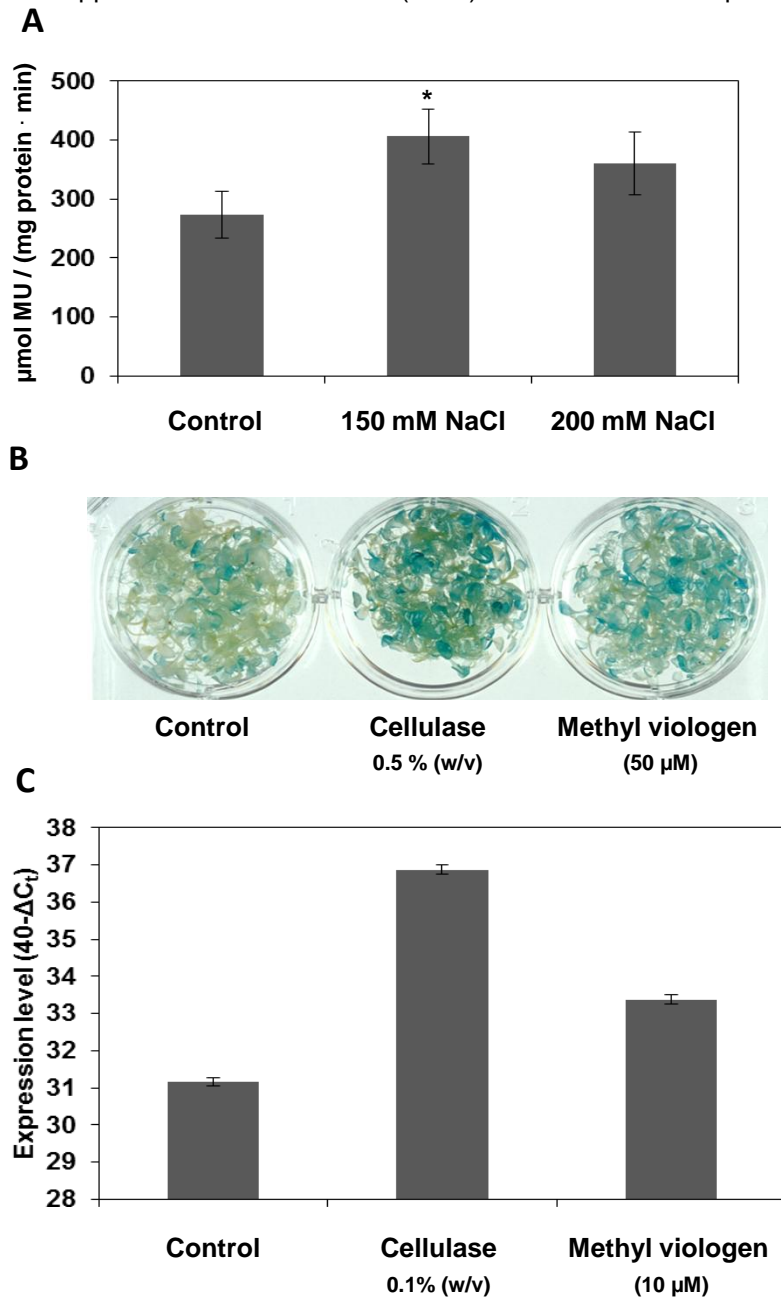

**Supplemental Figure 8. Effect of NaCl, Cellulase and Methyl Viologen on *JUB1* Expression.**

(A) GUS activity of *Pro<sub>JUB1</sub>:GUS* seedlings measured by MUG assay 24 h after treatment with 150 mM or 200 mM NaCl, respectively. The asterisk (\*) indicates significant difference ( $p < 0.05$ ) from the control treatment. (B) Twelve-day-old *Pro<sub>JUB1</sub>:GUS* were treated with 50 μM methyl viologen or 0.5% (w/v) cellulase for 3 h. Elevated GUS activity was observed in both treatments. (C) *JUB1* transcript abundance was determined by qRT-PCR in whole seedlings of wild-type *Arabidopsis* plants treated with 0.1% (w/v) cellulase or 10 μM methyl viologen after 5 h. Data are the means of three replicates  $\pm$  SD.

A

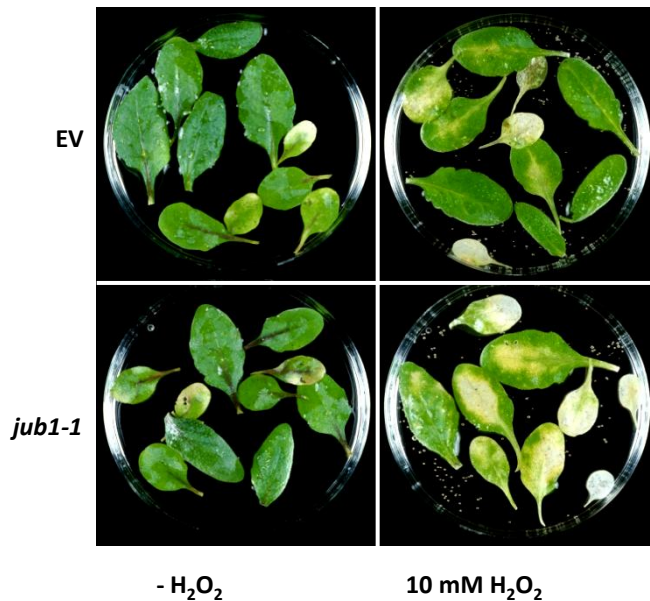

B

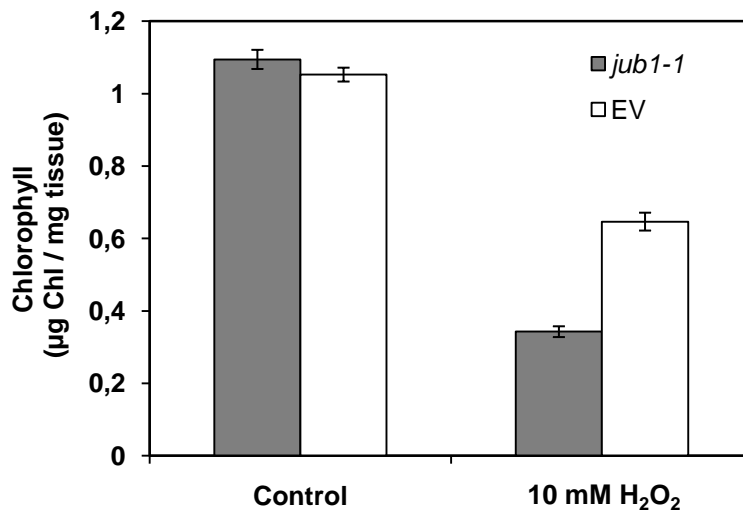

**Supplemental Figure 9. Effect of H<sub>2</sub>O<sub>2</sub> on Detached Leaves of the *jub1-1* Mutant.**

(A, B) Detached leaves of the 35-day-old *jub1-1* mutant and empty vector (EV) plants were incubated for 5 days in the absence or presence of 10 mM H<sub>2</sub>O<sub>2</sub>. Leaves of *jub1-1* plants retained less chlorophyll than those of the EV control. Data in (B) were obtained as three technical replicates from combined leaves of the experiment shown in (A). Means ± SD are given.

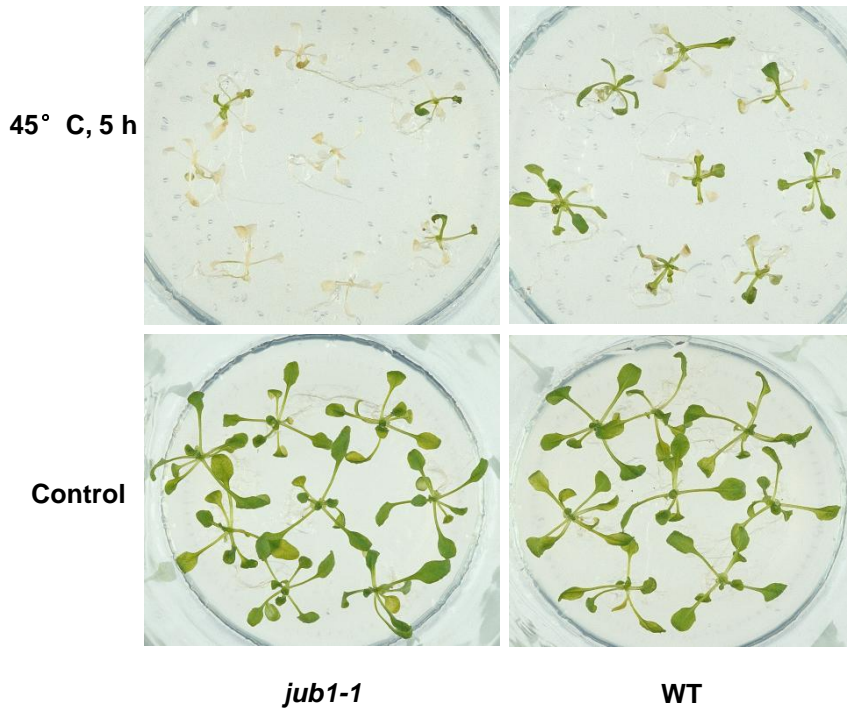

**Supplemental Figure 10. The *jub1-1* Mutant Exhibits Decreased Heat Stress Tolerance Compared to the Wild type.**

Two-week-old *Arabidopsis* seedlings of *jub1-1* and wild-type (WT) plants were incubated at 45°C for 5 h and then returned to the growth chamber at 22°C for 5 d. Note the reduced survival of *jub1-1* seedlings after heat stress.

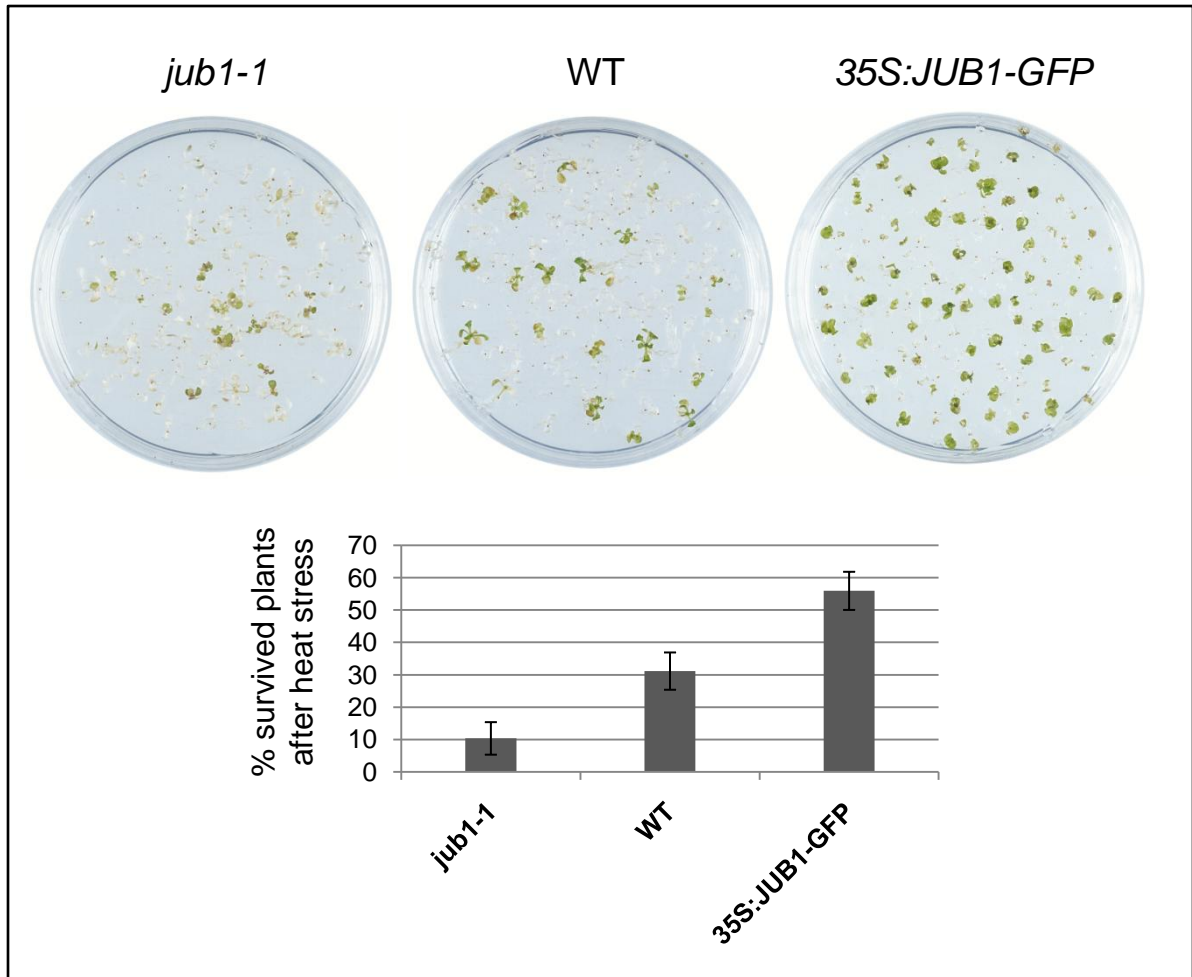

**Supplemental Figure 11. Enhanced Heat Stress Tolerance of *JUB1* Overexpressor.**

Seven-day-old *jub1-1*, wild-type (WT) and *35S:JUB1-GFP* seedlings grown at 23°C in a phytotron were transferred to 45°C for 45 min (by floating the media plates on water of a pre-heated water bath) and then returned to growth temperature. Photographs were taken 8 days later. Seedlings surviving the heat stress treatment were counted. The graph shows the results obtained from three independent biological experiments. Means  $\pm$  SD.

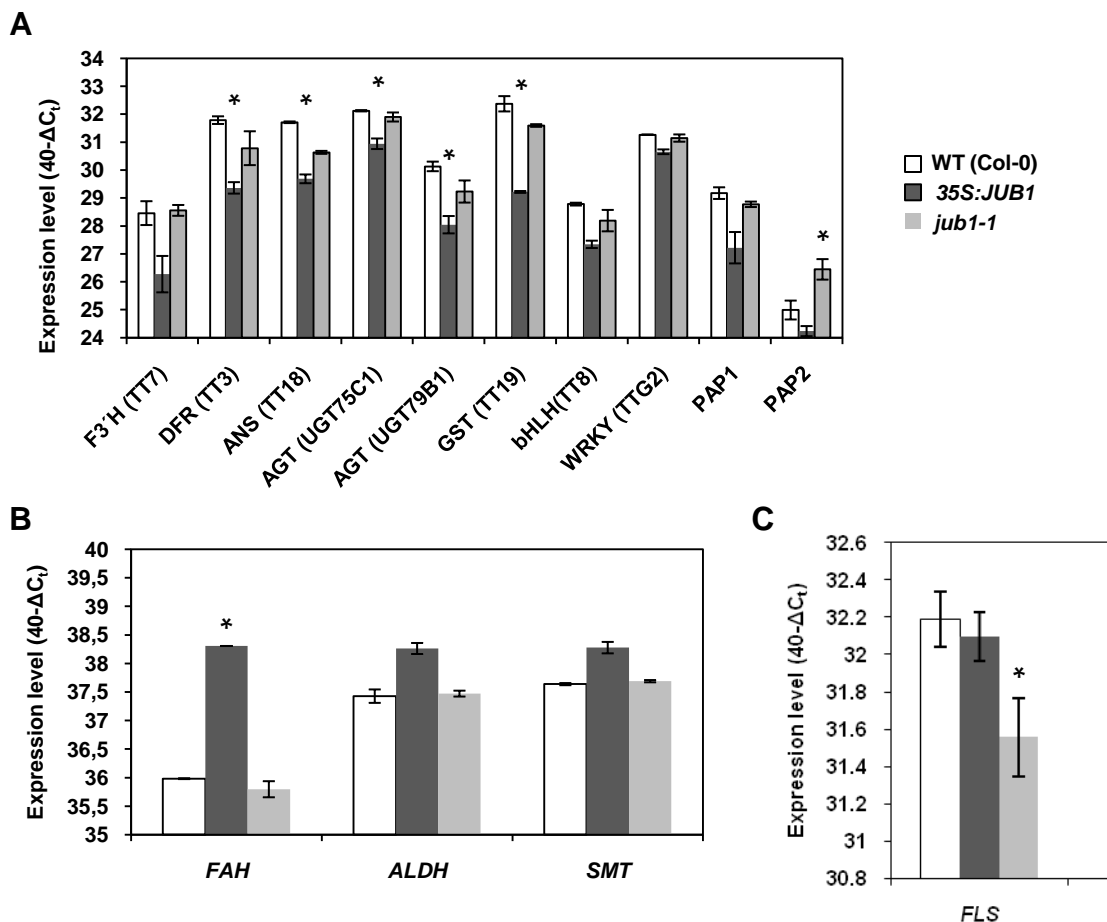

**Supplemental Figure 12. Expression of Secondary Metabolite-associated Genes in 35S:JUB1, jub1-1 and Wild-type (WT) Plants, Determined by qRT-PCR.**

**(A)** Anthocyanin biosynthetic genes. **(B)** Phenylpropanoid biosynthetic genes. **(C)** Flavonol-specific gene. Abbreviations: F3'H (*TT7*), flavonoid 3'-hydroxylase; DFR (*TT3*), dihydroflavonol reductase; ANS (*TT18*), anthocyanidin synthase; AGT (*UGT75C1*), anthocyanin 5-O-glucosyltransferase; AGT (*UGT79B1*), anthocyanin 3-O-glucoside 2"-O-xylosyltransferase; GST (*TT19*), glutathione-S-transferase; bHLH (*TT8*), transcription factor; WRKY (*TTG2*), transcription factor; *PAP1*, *AtMYB75*, transcription factor; *PAP2*, *AtMYB90*, transcription factor; FAH, *CYP84A1*, ferulate 5-hydroxylase; ALDH, *ALDH2C4*, aldehyde dehydrogenase; SMT, *SNG1*, malate sinapoyltransferase; FLS, *AtFLS1*, flavonol synthase. Data represent means  $\pm$  SD from three independent experiments. Asterisks (\*) indicate significant differences compared to WT ( $p < 0.05$ ; Student's *t*-test).

**Supplemental Table 1. NAC Transcription Factor T-DNA Insertion Lines Included in the Screen for Extended Longevity.**

| AGI code  | Gene          | Line                   | Source   |
|-----------|---------------|------------------------|----------|
| At1g01720 | ANAC002       | SALK_067648            | SALK     |
|           |               | SALK_057618            | SALK     |
|           |               | SALK_090242            | SALK     |
| At1g02220 | ANAC003       | SAIL_260_B02 (pCSA110) | Syngenta |
| At1g34180 | ANAC016       | SALK_001597*           | SALK     |
|           |               | SALK_126338            | SALK     |
| At1g52880 | ANAC018       | SALK_131128            | SALK     |
|           |               | SALK_056767            | SALK     |
| At1g52890 | ANAC019       | SALK_096295            | SALK     |
|           |               | SALK_096310            | SALK     |
| At1g69490 | ANAC029/AtNAP | SALK_005010            | SALK     |
| At1g77450 | ANAC032       | SALK_087702*           | SALK     |
| At2g33480 | ANAC041       | SALK_066378            | SALK     |
|           |               | SALK_010291            | SALK     |
| At2g43000 | ANAC042/JUB1  | SALK_036474*           | SALK     |
| At3g04060 | ANAC046       | SALK_107861            | SALK     |
| At3g04070 | ANAC047       | GABI_343H11-016164     | GABI-KAT |
|           |               | SALK_066615            | SALK     |
| At3g10500 | ANAC053       | SALK_009578            | SALK     |
|           |               | SALK_022946*           | SALK     |
| At3g15500 | ANAC055       | SALK_014331            | SALK     |
|           |               | SALK_011069            | SALK     |
| At3g15510 | ANAC056       | SALK_137131*           | SALK     |
| At3g29035 | ANAC059/ORS1  | GK-778C04 (pAC161)     | GABI-KAT |
| At4g27410 | ANAC072       | SALK_063576            | SALK     |
|           |               | SALK_072286            | SALK     |
|           |               | SALK_083756            | SALK     |
| At4g28530 | ANAC074       | SALK_094441            | SALK     |
|           |               | SALK_149691            | SALK     |
|           |               | SALK_104622*           | SALK     |
| At5g13180 | ANAC083/VNI2  | SALK_143793            | SALK     |
| At5g18270 | ANAC087       | SALK_011502*           | SALK     |
|           |               | SALK_079821            | SALK     |
| At5g22290 | ANAC089       | SALK_099786            | SALK     |
| At5g39610 | ANAC092/ORE1  | SALK_090154            | SALK     |
|           |               | SAIL_694_C04 (pDAP101) | Syngenta |
| At5g63790 | ANAC102       | SALK_030702*           | SALK     |
|           |               | SALK_094437*           | SALK     |
| At5g64530 | ANAC104       | SALK_023898*           | SALK     |
|           |               | SALK_046891*           | SALK     |
|           |               | SALK_022552            | SALK     |
| At4g35580 | NTL9          | SALK_065051            | SALK     |
|           |               | SALK_102041*           | SALK     |

Mutants labelled with an asterisk (\*) were used in their homozygous state (with respect to the T-DNA insertion). CaMV 35S overexpressors of the following transcription factors were included in the longevity screen: At3g04070, At5g39610/ORE1, At3g29035/ORS1, At2g43000/JUB1, and At5g64530. Only *JUB1* overexpressors showed extended longevity.

**Supplemental Table 2: Abbreviations of Enzyme Names.**

| Abbreviation                 | AGI code  |                | Enzyme                                                                                 |
|------------------------------|-----------|----------------|----------------------------------------------------------------------------------------|
| PAL                          | At2g37040 | AtPAL1         | phenylalanine ammonia-lyase                                                            |
| PAL                          | At3g53260 | AtPAL2         | phenylalanine ammonia-lyase                                                            |
| PAL                          | At5g04230 | AtPAL3         | phenylalanine ammonia-lyase                                                            |
| C4H                          | At2g30490 | CYP73A5        | cinnamate-4-hydroxylase                                                                |
| 4CL                          | At1g51680 | At4CL1         | 4-coumarate CoA ligase                                                                 |
| 4CL                          | At3g21240 | At4CL2         | 4-coumarate CoA ligase                                                                 |
| 4CL                          | At1g65060 | At4CL3         | 4-coumarate CoA ligase                                                                 |
| CHS                          | At5g13930 | TT4            | chalcone synthase                                                                      |
| CHI                          | At3g55120 | TT5            | chalcone isomerase                                                                     |
| CHI                          | At5g05270 | CHI            | chalcone isomerase                                                                     |
| F3'H                         | At5g07990 | TT7            | flavonoid 3'-hydroxylase                                                               |
| FLS                          | At5g08640 | FLS1           | flavonol synthase                                                                      |
| Fd3GlcT                      | At5g17050 | UGT78D2        | flavonoid 3-O-glucosyltransferase                                                      |
| F3RhaT                       | At1g30530 | UGT78D1        | flavonol 3-O-rhamnosyltransferase                                                      |
| F7RhaT                       | At1g06000 | UGT89C1        | flavonol 7-O-rhamnosyltransferase                                                      |
| HCT                          | At5g48930 | HCT            | hydroxycinnamoyl-Coenzyme A shikimate/quinate hydroxycinnamoyltransferase              |
| C3H                          | At2g40890 | CYP98A3        | coumarate 3-hydroxylase                                                                |
| CCoAOMT                      | At4g34050 | CCoAOMT1       | caffeoyl/CoA 3-O-methyltransferase                                                     |
| CCR                          | At1g15950 | AtCCR1         | cinnamoyl-CoA reductase                                                                |
| FAH                          | At4g36220 | FAH1/CYP84A1   | ferulate 5-hydroxylase                                                                 |
| CAD                          | At3g19450 | AtCAD4         | cinnamoyl-alcohol dehydrogenase                                                        |
| CAD                          | At4g34230 | AtCAD5         | cinnamoyl-alcohol dehydrogenase                                                        |
| OMT                          | At5g54160 | AtOMT1         | caffeic acid/5-hydroxyferulic acid O-methyltransferase flavonol 3'-O-methyltransferase |
| ALDH                         | At3g24503 | ALDH2C4/ALDH1A | aldehyde dehydrogenase                                                                 |
| SGT                          | At3g21560 | UGT84A2        | sinapic acid 1-O-UDP-glucosyltransferase                                               |
| SMT                          | At2g22990 | SNG1           | malate sinapoyltransferase.                                                            |
| ANS                          | At4g22880 | TT18 LDOX      | anthocyanidin synthase                                                                 |
| DFR                          | At5g42800 | TT3            | dihydroflavonol reductase                                                              |
| AGT                          | At4g14090 | UGT75C1        | anthocyanin 5-O-glucosyltransferase                                                    |
| AGT                          | At5g54060 | UGT79B1        | anthocyanin 3-O-glucoside 2"-O-xylosyltransferase                                      |
| AAT                          | At3g29590 | A5G6''MaT      | anthocyanin 5-O-glucoside 6'''-O-malonyltransferase                                    |
| AAT                          | At1g03940 | A3G6''p-CouT   | anthocyanin 3-O-glucoside 6"-O-p-coumaroyltransferase                                  |
| GST                          | At5g17220 | TT19/AtGSTF12  | glutathione-S-transferase                                                              |
| <b>Transcription factors</b> |           |                |                                                                                        |
| WD40                         | At5g24520 | TTG1           | WD-40 repeat protein                                                                   |
| bHLH                         | At4g09820 | TT8            | basic helix-loop-helix dimerisation region                                             |
| WRKY                         | At2g37260 | TTG2           | DNA-binding WRKY                                                                       |
| MYB                          | At1g56650 | PAP1/AtMYB75   | R2R3 MYB protein                                                                       |
| MYB                          | At1g66390 | PAP2/AtMYB90   | R2R3 MYB protein                                                                       |
| MYB                          | At2g47460 | AtMYB12        | R2R3 MYB protein                                                                       |
| MYB                          | At3g62610 | AtMYB11        | R2R3 MYB protein                                                                       |
| MYB                          | At5g49330 | AtMYB111       | R2R3 MYB protein                                                                       |
